1 Fluoxetine effects on behavior and adult hippocampal neurogenesis in female C57BL/6J mice  
2 across the estrous cycle

3

4 Christine N. Yohn, Sophie Shifman, Alexander Garino, Emma Diethorn, Leshya Bokka, Sandra  
5 A. Ashamalla, Benjamin Adam Samuels

6

7

8 Department of Psychology

9 Rutgers University

10 152 Frelinghuysen Rd

11 Piscataway, NJ 08854

12 USA

13

14 Address correspondence to:

15 Benjamin Adam Samuels

16 [ben.samuels@rutgers.edu](mailto:ben.samuels@rutgers.edu)

17 (848) 445-8933

18

19 Christine N. Yohn

20 [cy253@scarletmail.rutgers.edu](mailto:cy253@scarletmail.rutgers.edu)

21 (848)-445-8945

22

23

24 **Abbreviations**

25 DG = Dentate Gyrus

26 FLX = Fluoxetine

27 OVX = Ovariectomized

28 EPM = Elevated Plus Maze

29 NSF = Novelty Suppressed Feeding

30 FST = Forced Swim Test

31 Light Dark = LD

32 Open Field = OF

33 SSRI = Selective Serotonin Reuptake Inhibitor

34 DCX = Doublecortin

35

36

37

38

39

40

41

42

43

44

45

46

47 Abstract

48           Some mood disorders, such as major depressive disorder, are more prevalent in women  
49 than in men. However, historically preclinical studies in rodents have a lower inclusion rate of  
50 females than males, possibly due to the fact that behavior can be affected by the estrous cycle.  
51 Several studies have demonstrated that chronic antidepressant treatment can decrease anxiety-  
52 like behaviors and increase adult hippocampal neurogenesis in male rodents. However, very few  
53 studies have conclusively looked at the effects of antidepressants on behavior and neurogenesis  
54 across the estrous cycle in naturally cycling female rodents. Here we analyze the effects of  
55 chronic treatment with the selective serotonin reuptake inhibitor (SSRI) fluoxetine (Prozac) on  
56 behavior and adult hippocampal neurogenesis in naturally cycling C57BL/6J females across all  
57 four phases of the estrous cycle. Interestingly, we find that the effects of fluoxetine on both  
58 behavior and adult hippocampal neurogenesis are driven by mice specifically in the estrus or  
59 diestrus phases of the estrous cycle. Taken together our data is the first to illustrate the impact of  
60 fluoxetine on brain and behavior across all four stages of the murine estrous cycle.

61

62 Highlights:

- 63       • Chronic fluoxetine reduces anxiety-like behaviors in naturally cycling female mice
- 64       • Chronic fluoxetine increases adult hippocampal neurogenesis in naturally cycling female  
65       mice
- 66       • The effects of chronic fluoxetine on behavior and adult hippocampal neurogenesis are  
67       driven by the estrus and diestrus phases of the estrous cycle

68

69 Keywords: Estrous Cycle, Adult Neurogenesis, Anxiety, Depression, Antidepressants, Females

## 70 **1. Introduction**

71 Although major depressive disorder is more prevalent in women than men (Kessler,  
72 2003; Sloan & Kornstein, 2003), females are often excluded from rodent experimental studies  
73 since fluctuations in ovarian steroid hormones (Arakawa et al., 2014; Lovick, 2012), such as  
74 estrogen, estradiol, and progesterone, across the female's estrous cycle can confound  
75 experimental results. In humans, women can experience depression and anxiety due to  
76 premenstrual syndrome, where variations in mood states are correlated with different secretion  
77 patterns of estrogen and progesterone across the menstrual cycle (Shors & Leuner, 2003).  
78 Rodents display similar fluctuations in behavior, with diestrus female rodents having higher  
79 responses to stress and increased anxiety-related behaviors as compared to proestrus females  
80 (Lovick, 2012; D'Souza & Sadanada, 2017; Sayin et al., 2014; Marcondes et al., 2001). While  
81 these studies illustrate the influence of the estrous cycle on animal behavior, they were  
82 predominately conducted in rats not mice. In comparing two mouse strains, Meziane and  
83 colleagues (2007) observed that C57BL/6J females have less variation in anxiety-like behaviors  
84 across the estrous cycle than BALB/cByJ females. However, commonly used negative valence  
85 tests associated with anxiety-like behavior, such as elevated plus maze (EPM) and novelty  
86 suppressed feeding (NSF), were not included in this study. Therefore, detailed behavioral  
87 analyses across the mouse estrous cycle is still needed.

88 Variations in gonadal steroid hormone secretion patterns, as seen in cycling females, can  
89 contribute to hippocampal structural and functional impairments, such as alterations in adult  
90 neurogenesis (Tanapat et al., 2005; Barha et al., 2009) within the subgranular zone of the dentate  
91 gyrus (DG) (Tanapat et al., 1999). For instance, proestrus rats have higher DG cell proliferation  
92 than estrus or diestrus rats with these differences most likely attributed to higher estradiol levels

93 during the proestrus phase (Sadrollahi et al., 2014; Tanapat et al., 1999; Pawluski et al., 2009).  
94 While many studies document the effects of the estrous cycle and administration of estrogens to  
95 mimic a cycle stage in ovariectomized (OVX) rats on DG cell proliferation, these effects may be  
96 species specific since Lagace and colleagues (2007) observed no significant differences in adult  
97 hippocampal cell proliferation within C57BL/6J mice. However, whether the estrous cycle  
98 impacts other stages of adult hippocampal neurogenesis, such as doublecortin which labels  
99 young and mature neurons (Plumpe et al., 2006), in C57BL/6J mice is unknown. Regardless of  
100 species differences in estrous effects on adult hippocampal cell proliferation, understanding the  
101 impact the estrous cycle has on adult hippocampal neurogenesis is important since  
102 pharmacotherapies, such as antidepressants, exert beneficial effects on behavior in part by  
103 increasing adult hippocampal neurogenesis (Malberg et al., 2000; David et al., 2009; Santarelli et  
104 al., 2003). While Sayin and colleagues (2014) illustrate that citalopram, a selective serotonin  
105 reuptake inhibitor (SSRI), alleviates differences in anxiety-like behavior between proestrus and  
106 non-proestrus rats, few studies have examined the impact of SSRIs on behavior and neurogenesis  
107 in intact, cycling female mice. Therefore, the current study aims to assess the behavioral and  
108 neural effects of fluoxetine (FLX), a SSRI, across the estrous cycle.

## 109 **2. Methods**

### 110 **2.1 Subjects**

111 Adult 8 week old female C57BL/6J strain mice (n = 41) were purchased from  
112 Jackson laboratories. All mice were maintained on a 12L:12D schedule with food  
113 and water provided *ad libitum*. For 3 weeks FLX (18 mg/kg/day) or vehicle  
114 (deionized water) was delivered via oral gavage. On behavioral testing days FLX  
115 or vehicle was administered after mice completed the behavioral test to avoid

116 acute effects. All testing was conducted in compliance with the NIH laboratory  
117 animal care guidelines and approved by Rutgers University Institutional Animal  
118 Care and Use Committee.

## 119 **2.2 Vaginal Lavage**

120 To examine estrous cycle state vaginal lavages were performed throughout  
121 FLX/vehicle treatment, after completing each behavioral test, and prior  
122 euthanasia. In order to collect the samples, a pipet was filled with ddH<sub>2</sub>O, placed  
123 at the opening of the mouse's vaginal canal (without penetration) with ddH<sub>2</sub>O  
124 gently expelled and suctioned back (for detailed methods see McLean et al., 2012;  
125 Byers et al., 2012). Samples were then placed on a slide warmer to dry for  
126 approximately 5 minutes and imaged under a EVOS FL Auto 2.0 microscope  
127 (Thermofisher Scientific) at 10x magnification. Estrous phase was identified by  
128 the presence or absence of nucleated epithelial cells, cornified epithelial cells, and  
129 leukocytes (Byers et al., 2012; Felicio et al., 1984). Mice in proestrus displayed  
130 mostly nucleated and some cornified cells (Figure 1B). Estrus was recorded as the  
131 presence of mostly cornified epithelial cells, with the presence of a few nucleated  
132 cells in early estrus (Figure 1B). Metestrus was determined by the presence of  
133 cornified epithelial cells and polymorphonuclear leukocytes (Byers et al., 2012),  
134 while mice in diestrus contained mainly polymorphonuclear leukocytes with few  
135 epithelial cells being present (Figure 1B).

## 136 **2.3 Behavioral Testing**

### 137 **2.3.1 Open Field (OF)**

138 Motor activity was quantified in five Plexiglass open field boxes 43 x 43 cm<sup>2</sup>

139 (Kinder Scientific). The recording of x-y ambulatory movements was recorded by  
140 two sets of 16 pulse-modulated infrared photobeams placed on opposite walls 2.5  
141 cm apart to. As previously described (David et al., 2009), activity chambers were  
142 computer interfaced for data sampling at 100ms resolution. The computer  
143 software predefines grid lines that divide each open field chamber into center and  
144 periphery regions, with the center being a square 11cm from the wall. The number  
145 of entries, distance traveled, and total time spent in the center were recorded, as  
146 well as percent of distance traveled in the center defined as center distance  
147 divided by total distance traveled (Supplemental Figure 1A). To measure overall  
148 motor activity total distance (cm) was quantified.

### 149 **2.3.2 Novelty Suppressed Feeding (NSF)**

150 After undergoing 18 hours of food deprivation within their home cage, mice were  
151 placed in the corner of a testing apparatus (50x50x20 cm) filled with  
152 approximately 2 cm of corncob bedding and a single pellet of food attached to a  
153 white platform in the center of the box. The center of the box was illuminated at  
154 1500 lux. The NSF test lasted 6 minutes, where the latency to eat (defined as the  
155 mouse sitting on its haunches and biting the pellet with the use of forepaws) was  
156 timed/recorded. If a mouse did not consume food during the NSF a latency of  
157 360secs was recorded. Immediately afterwards, the mice were transferred to their  
158 home cage to assess home cage feeding behavior for 5 minutes (Supplemental  
159 Figure 1D-F). During this task latency to eat and amount of food consumed was  
160 measured as a control for feeding behavior observed in the NSF task. Each mouse  
161 was weighed before food deprivation and after home cage feeding to assess the

162 percentage of body weight loss. Following home cage feeding, mice were placed  
163 in a new home cage with cage mates and returned to the colony room.

### 164 **2.3.3 Light Dark (LD)**

165 The light/dark test was conducted in an open field chamber measuring 43.2 x 43.2  
166 cm (Kinder Scientific, USA), with a clear floor and walls. To divide the open  
167 field into separate light and dark compartments, a dark plastic box that covered  
168 one third of the chamber was inserted. The dark box was opaque to visible light,  
169 but transparent to infrared light, and contained an opening that allowed passage  
170 between the light and dark compartments (David et al., 2009). The light  
171 compartment was brightly illuminated at 1000 lux. At the beginning of each 5-  
172 minute test, mice were placed in the dark compartment. An observer blind to  
173 treatment groups recorded the latency to emerge into the light (Supplemental  
174 Figure 1C). Using Activity Monitor (Kinder Scientific, USA) software, total time  
175 in the light and ambulatory distance in both compartments was analyzed. To  
176 calculate percent distance traveled in the light, distance traveled in the light was  
177 divided by total distance traveled (Supplemental Figure 1B).

### 178 **2.3.4 Elevated Plus Maze (EPM)**

179 The EPM test consisted of a plus-shaped apparatus with two open and two closed  
180 arms (side walls), elevated 2 feet from the floor. During the five-minute test, the  
181 mouse's behavior was recorded from a video camera mounted above each EPM  
182 arena. EthoVision (Noldus) software was then used to score time spent in the  
183 open arms, entries, and distance traveled in both open and closed arms. By  
184 dividing total open arm distance traveled by total distance traveled, we were able



185 to analyze percent distance traveled in open arms.

### 186 **2.3.5 Forced Swim Test (FST)**

187 A modified FST procedure suitable for mice was used (David et al., 2009).

188 Individual cylinders (46 cm tall x 32 cm in diameter x 30 cm deep) were filled

189 with room-temperature water (25-26°C) before placing each mouse into the

190 cylinder. Two sets of photobeams were mounted on opposite sides of the cylinder

191 (Kinder Scientific, USA) to allow for the recording of swimming behavior during

192 the 6-minute test. Immobility times (measured by beam breaks over 5-second

193 intervals) were assessed during the last 4-minutes of the test since mice are

194 habituating to the task during the initial 2-minutes of the test.

## 195 **2.4 Brain Collection, Sectioning and Immunohistochemistry**

### 196 **2.4.1 Brain Collection and Sectioning**

197 Subsequent to the completion of all behavioral testing, brains were collected from

198 all experimental mice. Mice were anesthetized with ketamine (80mg/kg) and

199 perfused transcardially with PBS followed by 4% paraformaldehyde. Brains were

200 collected and stored in 4% paraformaldehyde overnight at 4°C. Next, brains were

201 switched to a 30% sucrose 0.1% sodium azide (NaN<sub>3</sub>) in PBS solution and stored

202 at 4°C until they were sectioned. Using a cryostat, serial sections of the

203 hippocampus (Franklin & Paxinos mouse brain atlas 3<sup>rd</sup> edition; Bregma -1.22 to -

204 3.88) were collected onto Superfrost Plus slides (Thermofisher Scientific) and

205 stored at -20°C until staining and further analysis.

### 206 **2.4.2 Ki67 labeling for cell proliferation**

207 The effects of FLX treatment on cell proliferation were assessed across 12 serial  
208 sections of the hippocampus. Using mailers, slides were washed in 1% Triton X-  
209 100 PBS for 5 minutes before undergoing three PBS washes. Next, slides were  
210 incubated in warm citrate buffer for 30 minutes and then washed times in PBS.  
211 Slides were then transferred to an opaque moisture chamber (details) for the  
212 blocking and overnight incubation step. Slides were blocked for 1 hour in 10%  
213 normal goat serum (NGS) diluted in PBS before being incubated overnight at 4°C  
214 in anti-rabbit ki67 (1:500; abCam, ab16667) diluted in 2% NGS PBS. Following  
215 18 hours of incubation slides were washed 3 times in PBS before being incubated  
216 at room temperature for 2 hours in CY-5 goat anti-rabbit (1:1000, Invitrogen,  
217 Thermo Fisher Scientific, A10523) diluted in 2% NGS PBS. Next slides were  
218 washed with PBS then counterstained with DAPI (1:15000) for 15 minutes.  
219 Finally, slides were washed with PBS and cover slipped using the mounting  
220 medium prolong diamond. Fluorescent images were taken using a EVOS FL Auto  
221 2.0 microscope (Thermofisher Scientific) at 10x magnification, where ki67<sup>+</sup> cells  
222 overlaid with DAPI across the 12 sections of hippocampus were collected and  
223 counted.

#### 224 **2.4.3 Doublecortin (DCX) labeling for maturation**

225 12 serial hippocampal sections for doublecortin (DCX) were stained using the  
226 primary antibody doublecortin anti-goat (1:500; Life technologies; 481200) and  
227 secondary antibody CY-5 goat anti-rabbit (1:1000, Invitrogen, Thermo Fisher  
228 Scientific, A10523). Fluorescent images were taken using using a EVOS FL Auto  
229 2.0 microscope (Thermofisher Scientific) at 10x magnification, where DCX<sup>+</sup> cells

230 across the 12 sections of hippocampus were collected and counted. Following  
231 imaging, DCX<sup>+</sup> cells were counted and subcategorized according to their  
232 dendritic morphology: DCX<sup>+</sup> cells with no tertiary dendritic processes and DCX<sup>+</sup>  
233 cells with complex, tertiary dendrites. The maturation index was defined as the  
234 ratio of DCX<sup>+</sup> cells possessing tertiary dendrites over the total DCX<sup>+</sup> cells.

## 235 **2.5 Statistical Analyses**

236 To analyze both behavioral and molecular differences between treatment groups and  
237 estrous cycle stages separate 2x4 analyses of variance (ANOVA) were conducted. Each  
238 ANOVA was followed by subsequent Bonferroni post-hoc analyses to further assess  
239 between and within group differences across the estrous cycle. Since we imposed a cutoff  
240 time during the NSF, we ran a Kaplan Meier survival analysis (nonparametric test) that  
241 permits censoring of these data points to analyze differences in feeding latencies.

## 242 **3. Results**

### 243 **3.1 FLX and vehicle behavioral differences across estrous cycle**

244 We treated a large cohort of adult C57BL/6J female mice (n= 41) with 18mg/kg FLX for  
245 three weeks (Figure 1A) and then exposed these mice to the Open Field (OF), Light Dark  
246 Test (LD), EPM, NSF test, and Forced Swim Test (FST). To assess estrous cycle phase  
247 (Figure 1B), vaginal lavages were performed two weeks prior to behavior, following each  
248 behavioral test, and on the days between behavioral tests. We found significant treatment  
249 effects in the EPM and FST, such that FLX mice spent more time in the open arms  
250 (F(1,32)=19.05, p<0.001; Figure 1C) and less time immobile (F(1,35) = 15.15, p < 0.001;  
251 Figure 1D) than vehicle mice. In the EPM, planned Bonferroni post-hoc comparisons  
252 revealed treatment differences in open arm time within the estrus phase, such that estrus

253 FLX-treated mice spent more time in the open arm than estrus vehicle-treated mice,  $t(32) =$   
254 1.56,  $p = 0.001$  (Figure 1C). Additionally, post-hoc comparisons revealed immobility time in  
255 the FST was significantly different between treatment groups within the estrus and diestrus  
256 phases, such that vehicle mice spent significantly more time immobile than FLX mice within  
257 both the estrus ( $t(10) = 2.41$ ,  $p = 0.02$ ) and diestrus ( $t(11) = 2.23$ ,  $p = 0.03$ ) phases (Figure  
258 1D), with a nonsignificant trend emerging in the metestrus phase ( $t(9) = 2.62$ ,  $p = 0.052$ ). We  
259 found no significant effects of treatment or estrous phase nor interaction effect on behaviors  
260 within the OF and LD tests (Supplemental Figure 1A-C).

261 In the NSF, a Kaplan Meier survival analysis log rank test revealed that FLX  
262 significantly reduces latency to feed,  $\chi^2(1) = 8.37$ ,  $p = 0.0038$  (Figure 1E, 1F), as compared  
263 to vehicle mice. Additionally, we observed that the estrus phase of the estrous cycle impacted  
264 group differences in latency to feed, with FLX females in estrus having lower latencies to  
265 feed than estrus vehicle females  $\chi^2(1) = 6.9$ ,  $p = 0.008$ . There was no treatment effect nor  
266 estrous effect on home cage latency, amount of food consumed in home cage, or percent  
267 weight change (Supplemental Figure 1D-F).

268 Taken together, these data suggest that the effects of FLX on behavior are most  
269 consistent across tests during the estrus stage.

### 270 **3.2 Fluoxetine treatment and estrous cycle state impact adult neurogenesis**

271 Several days following the FST, we perfused the mice and collected serial sections  
272 through the DG. Next, we performed immunostaining to determine the effects of FLX on the  
273 distinct stages of adult hippocampal neurogenesis across the different phases of the estrous  
274 cycle. We first stained for the cell proliferation marker Ki67 and found that FLX-treated

275 mice had more Ki67<sup>+</sup> cells than vehicle-treated mice  $F(1, 37) = 5.34, p = 0.026$  (Figure 2A).

276 We observed no estrous cycle effects nor interaction on number of Ki67<sup>+</sup> cells ( $p$ 's  $> 0.05$ ).

277 We next performed immunostaining with the young neuron marker DCX, and observed  
278 that FLX-treated mice showed more DCX<sup>+</sup> cells within the DG than vehicle-treated mice  
279  $F(1, 37) = 13.44, p < 0.001$ . We found a significant interaction effect between treatment and  
280 estrous phase  $F(3, 37) = 4.57, p = 0.008$ . Planned post-hoc comparisons revealed that FLX-  
281 treated mice had more DCX<sup>+</sup> cells than vehicle mice within the estrus ( $t(9) = 3.95, p < 0.001$ )  
282 and diestrus ( $t(11) = 3.29, p = 0.009$ ; Figure 2B) phases. Within the vehicle group, planned  
283 comparisons revealed that proestrus females had significantly more DCX<sup>+</sup> cells than both  
284 estrus ( $t(10) = 4.76, p = 0.001$ ) and diestrus ( $t(11) = 3.71, p = 0.01$ ) female mice (Figure 3A).  
285 Additionally, metestrus vehicle-treated mice had significantly more DCX<sup>+</sup> cells than both  
286 estrus ( $t(9) = 4.8, p < 0.001$ ) and diestrus ( $t(9) = 3.82, p = 0.008$ ) vehicle-treated mice (Figure  
287 3A). Within the FLX group no differences in DCX<sup>+</sup> cell expression was observed across the  
288 estrous cycle.

289 To assess maturation of the young neurons, we counted the DCX<sup>+</sup> neurons that displayed  
290 tertiary dendrites. As expected, FLX-treated mice had more mature neurons than vehicle  
291 mice as indicated by the number of DCX<sup>+</sup> cells with tertiary dendrites ( $F(1, 37) = 20.56, p <$   
292  $0.001$ ; Figure 2C). A significant interaction between treatment group and estrous cycle phase  
293 emerged ( $F(3, 37) = 5.33, p = 0.004$ ), with FLX mice having more DCX<sup>+</sup> cells with tertiary  
294 dendrites than vehicle mice in the estrus ( $t(9) = 4.19, p < 0.001$ ) and diestrus ( $t(11) = 4.23, p$   
295  $< 0.001$ ) phases. Within the vehicle group, planned post-hoc comparisons revealed that  
296 proestrus females have more DCX<sup>+</sup> cells with tertiary dendrites than estrus ( $t(10) = 6.01, p =$   
297  $0.003$ ) and diestrus ( $t(10) = 5.09, p = 0.011$ ) females (Figure 3B). Planned comparisons also

298 revealed that metestrous vehicle-treated females had more mature neurons than estrus ( $t(9) =$   
299 4.94,  $p = 0.013$ ) and diestrus ( $t(9) = 4.06$ ,  $p = 0.04$ ) vehicle-treated females (Figure 3B).  
300 Within the FLX group, we observed no differences in expression of DCX<sup>+</sup> cell with tertiary  
301 dendrites across the estrous cycle.

302 Lastly, we observed that FLX mice have a higher maturation index ( $F(1, 37) = 10.98$ ,  $p =$   
303 0.002; Figure 2D) than vehicle mice. We observed a significant interaction effect between  
304 treatment group and estrous cycle phase ( $F(3, 37) = 3.23$ ,  $p = 0.033$ ), with FLX females  
305 having a significantly higher maturation index than vehicle females in both the estrus, ( $t(9) =$   
306 3.07,  $p = 0.004$ ) and diestrus ( $t(11) = 3.13$ ,  $p = 0.003$ ) phases (Figure 2D). Within both the  
307 vehicle (Figure 3C) and FLX group we observed no differences in the maturation index  
308 across the estrous cycle. Taken together, these data suggest that the effects of fluoxetine on  
309 adult hippocampal neurogenesis are most pronounced during both the estrus and diestrus  
310 stage.

## 311 **4. Discussion**

### 312 **4.1 FLX and vehicle behavioral differences across estrous cycle**

313 We used an array of negative valence behavioral tests to evaluate the impact of  
314 antidepressant treatment on anxiety-like behaviors across the estrous cycle. Prior to  
315 behavioral testing we tracked the females estrous cycle for two weeks to assess whether  
316 females were cycling together within the same housing room. Although Meziane and  
317 colleagues (2007) observed that females within the same room cycle together, we observed  
318 that females within this study had out of sync cycles allowing for us to investigate the  
319 different estrous cycle phases during each behavioral test. Similar to previous studies in  
320 males (David et al., 2009), our data illustrates that FLX treatment in females reduces anxiety-

321 like behaviors within the EPM and NSF, and decreases immobility in the FST. However, our  
322 data demonstrates that estrous cycle significantly impacts the effects of FLX on behavior.  
323 FLX-treated females in the estrus phase display a reduction in anxiety-like behavior in the  
324 EPM and NSF, and reduced immobility in the FST relative to vehicle-treated estrus females.  
325 Diestrus FLX-treated females had lower immobility times in the FST than diestrus vehicle  
326 females, but FLX was ineffective in the anxiety-related EPM and NSF tasks. Furthermore,  
327 the behavioral effects of FLX were not significant in any of these tasks during metestrus and  
328 proestrus. Recently, Sayin and colleagues (2014) observed that proestrus rats display less  
329 anxiety-like behaviors than non-proestrus rats in the EPM, with estrous cycle differences  
330 attenuated following citalopram administration. Compared to our data, these data suggest that  
331 species differences may exist in anxiety-like behaviors across the estrous cycle. Although we  
332 did not observe an effect of the estrous cycle on behavior within treatment, a previous study  
333 observed that C57BL/6J females have less variation in anxiety-like behaviors across the  
334 estrous cycle than BALB/cByJ females (Meziane et al., 2007). Despite this, our data  
335 illustrate that FLX treatment has significant effects on behavior relative to vehicle treatment.  
336 However, our detailed analyses suggest that these effects of FLX are mainly driven by  
337 females in the estrus and diestrus phase.

338 Differences in behavior between treatment groups within estrus and diestrus may be  
339 related to fluctuations in estradiol and progesterone levels (Pawluski et al., 2009; Lovick,  
340 2012). Specifically, estradiol levels are the lowest during estrus and diestrus (Pawluski et al.,  
341 2009; Wood et al., 2007). Exogenous estradiol treatment to mimic diestrus in OVX rats  
342 results in decreases in anxiety-like behavior in the EPM compared to non-estrogen treated  
343 freely cycling diestrus rats (Marcondes et al., 2001). In mice, females in the estrus and

344 diestrus phases are more susceptible to individual housing stress and spend less time in the  
345 center of the open field arena than proestrus mice (Palanza et al., 2001). The impact of FLX  
346 administration on ovarian steroid hormones across the estrous cycle is understudied in  
347 rodents, and future studies will need to assess the relationship between antidepressant and  
348 endogenous ovarian hormone levels.

#### 349 **4.2 Fluoxetine treatment and estrous cycle state impact adult neurogenesis**

350 Similar to several other studies (Pawluski et al., 2014; Lagace et al., 2007), we observed  
351 that chronic FLX administration increased adult hippocampal neurogenesis levels relative to  
352 vehicle-treated females. Females treated with FLX had higher levels of cell proliferation  
353 (Figure 2A), higher numbers of both immature (Figure 2B) and mature neurons (Figure 2C),  
354 as well as a higher maturation index (Figure 2D) than vehicle treated females. However,  
355 similar to the effects on behavior, our study is the first to illustrate that the effects of FLX on  
356 adult hippocampal neurogenesis are most pronounced during the estrus and diestrus phases.  
357 Differences in adult hippocampal neurogenesis within estrus and diestrus could be attributed  
358 to natural low-levels of estradiol in these phases. Estrogens, such as estradiol, impact both  
359 cell proliferation and cell survival in the DG (Ormerod et al., 2003; Barha et al., 2009) and  
360 more proliferating cells are found in the proestrus phase than the non-proestrus phases  
361 (Sadrollahi et al., 2014; Tanapat et al., 1999; Pawluski et al., 2009). Discrepancies in  
362 proliferating cell numbers across the estrous cycle can be attributed to endogenous estrogen  
363 levels naturally peaking during the proestrus phase and decreasing during the estrus and  
364 diestrus phase (Pawluski et al., 2009). However, Lagace and colleagues (2007) show that  
365 endogenous levels of estradiol do not appear to impact adult hippocampal cell proliferation in  
366 mice, since OVX female mice have similar number of proliferating cells (BrdU<sup>+</sup>) and



367 immature neurons (DCX<sup>+</sup>) in the hippocampus as intact female mice. Furthermore, in  
368 assessing cell proliferation across 3 phases of the estrous cycle (proestrus, estrus, diestrus),  
369 Lagace and colleagues (2007) observed no differences in cell proliferation in the different  
370 phases. Similar to Lagace and colleagues (2007), we show that estrous cycle phase does not  
371 impact DG cell proliferation levels within treatment group. However, Lagace and colleagues  
372 (2007) did not assess differences in immature and mature neurons across the estrous cycle.  
373 We found that proestrus and metestrus vehicle-treated female mice have higher numbers of  
374 immature neurons (DCX<sup>+</sup>) within the DG than estrus and diestrus vehicle-treated female  
375 mice (Figure 3A). Additionally, we show that estrus and diestrus vehicle treated female mice  
376 have fewer mature neurons in the DG than proestrus and metestrus vehicle-treated female  
377 mice (Figure 3B). Interestingly, FLX specifically increased the numbers of immature (Figure  
378 2B) and mature (Figure 2C) neurons in the DG during estrus and diestrus relative to vehicle-  
379 treated mice. Therefore, no differences across the phases of the estrous cycle were observed  
380 within the FLX group. These data suggest that the effects of FLX on adult hippocampal  
381 neurogenesis are mainly driven by females in the estrus and diestrus phases of the estrous  
382 cycle.

383 Overall our study illustrates that the tracking the estrous cycle in experimental studies is  
384 crucial since different estrous phases show significant differences in behavior and adult  
385 hippocampal neurogenesis. Furthermore, the effects of FLX treatment are mainly driven by  
386 females in the estrus and diestrus phases. Future studies should assess whether  
387 antidepressants influence endogenous levels of ovarian hormones, such as estrogen and  
388 progesterone, since fluctuations in these hormones across the estrous cycle may attribute to  
389 differences in behavior and adult hippocampal neurogenesis. Given that sex differences in

390 the etiologies of mood disorders and symptomologies exist, preclinical studies that determine  
391 differences across the estrous cycle are critical for developing a better understanding of how  
392 these disorders develop and should be treated in females.

393

#### 394 Acknowledgments

395 This work was supported by the National Institute of Mental Health [Grant Number R01  
396 MH112861 to BAS]. The authors would also like to thank Mark M. Gergues, Kylee Shivok, and  
397 Debbie Ma for their assistance with this project.

398

399

400

401

402

403

404

405

406

407

408

#### 409 References

410 Arakawa, K., Arakawa, H., Hueston, C. M., & Deak, T. (2014). Effects of the estrous cycle and  
411 ovarian hormones on central expression of interleukin-1 evoked by stress in female rats.  
412 *Neuroendocrinology*, *100*(2-3), 162-177. doi:10.1159/000368606

- 413 Barha, C. K., Lieblich, S. E., & Galea, L. A. (2009). Different forms of oestrogen rapidly  
414 upregulate cell proliferation in the dentate gyrus of adult female rats. *J Neuroendocrinol*,  
415 *21*(3), 155-166. doi:10.1111/j.1365-2826.2008.01809.x
- 416 Byers, S. L., Wiles, M. V., Dunn, S. L., & Taft, R. A. (2012). Mouse estrous cycle identification  
417 tool and images. *PLoS One*, *7*(4), e35538. doi:10.1371/journal.pone.0035538
- 418 D'Souza, D., & Sadananda, M. (2017). Estrous Cycle Phase-Dependent Changes in Anxiety- and  
419 Depression-Like Profiles in the Late Adolescent Wistar-Kyoto Rat. *Ann Neurosci*, *24*(3),  
420 136-145. doi:10.1159/000477151
- 421 Felicio, L. S., Nelson, J. F., & Finch, C. E. (1984). Longitudinal studies of estrous cyclicity in  
422 aging C57BL/6J mice: II. Cessation of cyclicity and the duration of persistent vaginal  
423 cornification. *Biol Reprod*, *31*(3), 446-453.
- 424 Kessler, R. C. (2003). Epidemiology of women and depression. *J Affect Disord*, *74*(1), 5-13.
- 425 Lagace, D. C., Fischer, S. J., & Eisch, A. J. (2007). Gender and endogenous levels of estradiol do  
426 not influence adult hippocampal neurogenesis in mice. *Hippocampus*, *17*(3), 175-180.  
427 doi:10.1002/hipo.20265
- 428 Lovick, T. A. (2012). Estrous cycle and stress: influence of progesterone on the female brain.  
429 *Braz J Med Biol Res*, *45*(4), 314-320.
- 430 Malberg, J. E., Eisch, A. J., Nestler, E. J., & Duman, R. S. (2000). Chronic antidepressant  
431 treatment increases neurogenesis in adult rat hippocampus. *J Neurosci*, *20*(24), 9104-  
432 9110.
- 433 Marcondes, F. K., Miguel, K. J., Melo, L. L., & Spadari-Bratfisch, R. C. (2001). Estrous cycle  
434 influences the response of female rats in the elevated plus-maze test. *Physiol Behav*,  
435 *74*(4-5), 435-440.

- 436 McLean, A. C., Valenzuela, N., Fai, S., & Bennett, S. A. (2012). Performing vaginal lavage,  
437 crystal violet staining, and vaginal cytological evaluation for mouse estrous cycle staging  
438 identification. *J Vis Exp*(67), e4389. doi:10.3791/4389
- 439 Meziane, H., Ouagazzal, A. M., Aubert, L., Wietrych, M., & Krezel, W. (2007). Estrous cycle  
440 effects on behavior of C57BL/6J and BALB/cByJ female mice: implications for  
441 phenotyping strategies. *Genes Brain Behav*, 6(2), 192-200. doi:10.1111/j.1601-  
442 183X.2006.00249.x
- 443 Ormerod, B. K., Lee, T. T., & Galea, L. A. (2003). Estradiol initially enhances but subsequently  
444 suppresses (via adrenal steroids) granule cell proliferation in the dentate gyrus of adult  
445 female rats. *J Neurobiol*, 55(2), 247-260. doi:10.1002/neu.10181
- 446 Palanza, P., Gioiosa, L., & Parmigiani, S. (2001). Social stress in mice: gender differences and  
447 effects of estrous cycle and social dominance. *Physiol Behav*, 73(3), 411-420.
- 448 Pawluski, J. L., Brummelte, S., Barha, C. K., Crozier, T. M., & Galea, L. A. (2009). Effects of  
449 steroid hormones on neurogenesis in the hippocampus of the adult female rodent during  
450 the estrous cycle, pregnancy, lactation and aging. *Front Neuroendocrinol*, 30(3), 343-  
451 357. doi:10.1016/j.yfrne.2009.03.007
- 452 Pawluski, J. L., van Donkelaar, E., Abrams, Z., Houbart, V., Fillet, M., Steinbusch, H. W., &  
453 Charlier, T. D. (2014). Fluoxetine dose and administration method differentially affect  
454 hippocampal plasticity in adult female rats. *Neural Plast*, 2014, 123026.  
455 doi:10.1155/2014/123026
- 456 Plumpe, T., Ehniger, D., Steiner, B., Klempin, F., Jessberger, S., Brandt, M., . . . Kempermann,  
457 G. (2006). Variability of doublecortin-associated dendrite maturation in adult

- 458 hippocampal neurogenesis is independent of the regulation of precursor cell proliferation.  
459 *BMC Neurosci*, 7, 77. doi:10.1186/1471-2202-7-77
- 460 Popa, D., Cerdan, J., Reperant, C., Guiard, B. P., Guilloux, J. P., David, D. J., & Gardier, A. M.  
461 (2010). A longitudinal study of 5-HT outflow during chronic fluoxetine treatment using a  
462 new technique of chronic microdialysis in a highly emotional mouse strain. *Eur J*  
463 *Pharmacol*, 628(1-3), 83-90. doi:10.1016/j.ejphar.2009.11.037
- 464 Santarelli, L., Saxe, M., Gross, C., Surget, A., Battaglia, F., Dulawa, S., . . . Hen, R. (2003).  
465 Requirement of hippocampal neurogenesis for the behavioral effects of antidepressants.  
466 *Science*, 301(5634), 805-809. doi:10.1126/science.1083328
- 467 Sayin, A., Derinoz, O., Yuksel, N., Sahin, S., & Bolay, H. (2014). The effects of the estrus cycle  
468 and citalopram on anxiety-like behaviors and c-fos expression in rats. *Pharmacol*  
469 *Biochem Behav*, 124, 180-187. doi:10.1016/j.pbb.2014.06.002
- 470 Shors, T. J., & Leuner, B. (2003). Estrogen-mediated effects on depression and memory  
471 formation in females. *J Affect Disord*, 74(1), 85-96.
- 472 Sloan, D. M., & Kornstein, S. G. (2003). Gender differences in depression and response to  
473 antidepressant treatment. *Psychiatr Clin North Am*, 26(3), 581-594.
- 474 Tanapat, P., Hastings, N. B., & Gould, E. (2005). Ovarian steroids influence cell proliferation in  
475 the dentate gyrus of the adult female rat in a dose- and time-dependent manner. *J Comp*  
476 *Neurol*, 481(3), 252-265. doi:10.1002/cne.20385
- 477 Tanapat, P., Hastings, N. B., Reeves, A. J., & Gould, E. (1999). Estrogen stimulates a transient  
478 increase in the number of new neurons in the dentate gyrus of the adult female rat. *J*  
479 *Neurosci*, 19(14), 5792-5801.

480 Wood, G. A., Fata, J. E., Watson, K. L., & Khokha, R. (2007). Circulating hormones and estrous  
481 stage predict cellular and stromal remodeling in murine uterus. *Reproduction*, *133*(5),  
482 1035-1044. doi:10.1530/REP-06-0302

483  
484  
485 **Figure 1. Behavioral differences between FLX- and vehicle-treated female mice are also**  
486 **mediated by estrous phase.** A timeline depicting the experimental study is depicted above (A)  
487 with representative images of the four stages of the estrous cycle (10x magnification; scale = 500  
488  $\mu\text{m}$ ; B). Separate 2x4 ANOVAs were run and revealed that overall females treated with FLX  
489 spend less time in the open arms than vehicle mice ( $p < 0.001$ ), with this group difference being  
490 evident within the estrus phase of the estrous cycle ( $p = 0.005$ ; C). In the FST, FLX appeared to  
491 reduce overall immobility time ( $p < 0.001$ ), with FLX-treated females in the estrus and diestrus  
492 phases having significantly lower immobility scores than vehicle-treated females (D). Also,  
493 FLX-treated females have quicker latencies to eat in the NSF task than vehicle-treated females,  
494 with group differences being evident within the estrus phase (B). \* denotes  $p < 0.05$ ; \*\* denotes  
495  $p < 0.01$ ; \*\*\* denotes  $p < 0.001$

496  
497 **Figure 2. FLX increases all stages of neurogenesis with differences most pronounced within**  
498 **both the estrus and diestrus phases.** Visual representation of Ki67 and DCX immunostaining is  
499 depicted above for each treatment group across the estrous cycle phases. Images were taken at  
500 10x magnification (scale = 500  $\mu\text{m}$ ). FLX-treated females had higher adult cell proliferation  
501 ( $\text{Ki67}^+$ ) compared to vehicle animals, with no differences between groups emerging across the  
502 estrous cycle (A). FLX-treated females had more immature (B) and mature (C) neurons as well  
503 as a higher maturation index (D) compared to vehicle-treated females, with differences between  
504 groups most pronounced during the estrus and diestrus phases. \* denotes  $p < 0.05$ ; \*\* denotes  $p$   
505  $< 0.01$ ; \*\*\* denotes  $p < 0.001$

506  
507 **Figure 3. Estrous cycle impacts adult hippocampal neurogenesis in intact, cycling vehicle-**  
508 **treated female mice.** Planned post-hoc analyses within the vehicle group was conducted to  
509 assess impact of estrous cycle on adult hippocampal neurogenesis. No differences in adult  
510 hippocampal cell proliferation was noted across the estrous cycle in vehicle females  
511 (A). Proestrus and metestrus females had higher expression of immature (B) and mature (C)  
512 neurons than estrus and diestrus females. There was no impact of estrous cycle on maturation  
513 index (D). \* denotes  $p < 0.05$ ; \*\* denotes  $p < 0.01$ ; \*\*\* denotes  $p < 0.001$

514  
515 **Supplemental Figure 1. Treatment and estrous cycle do not impact anxiety-like behavior in**  
516 **the open field (A) and light dark test (B-C) as well as home cage feeding following the NSF**  
517 **task (D-F).**

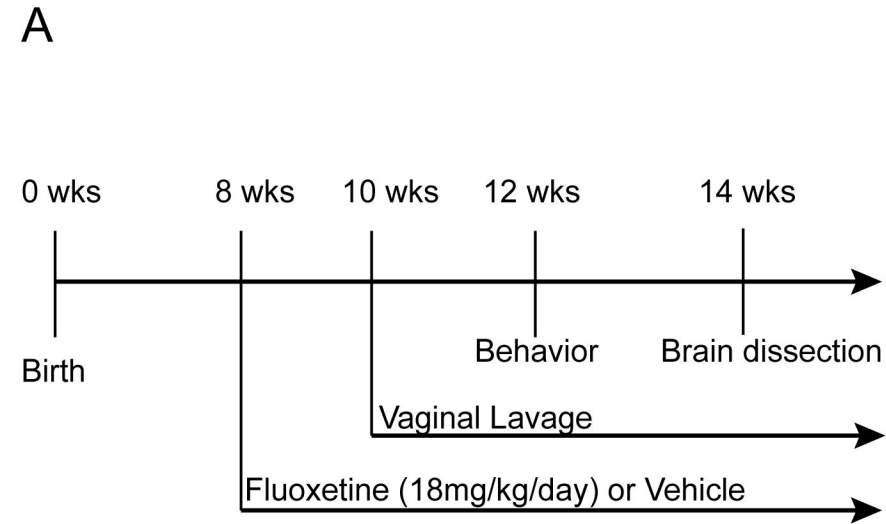

○ Vehicle  
● Fluoxetine

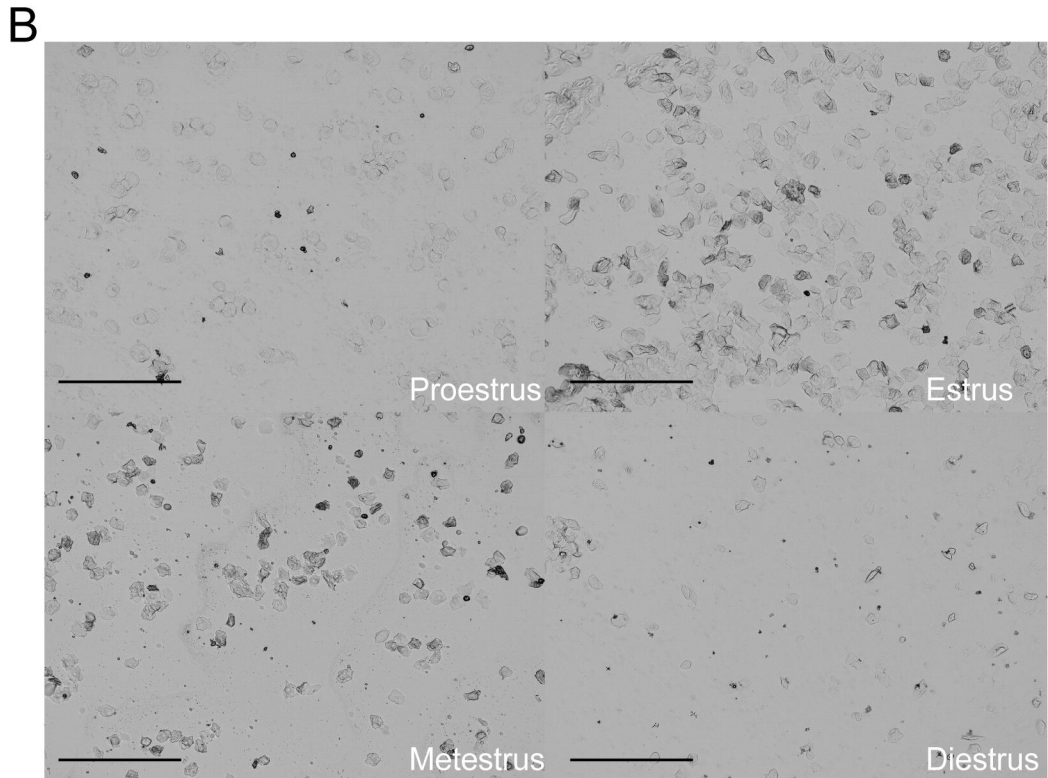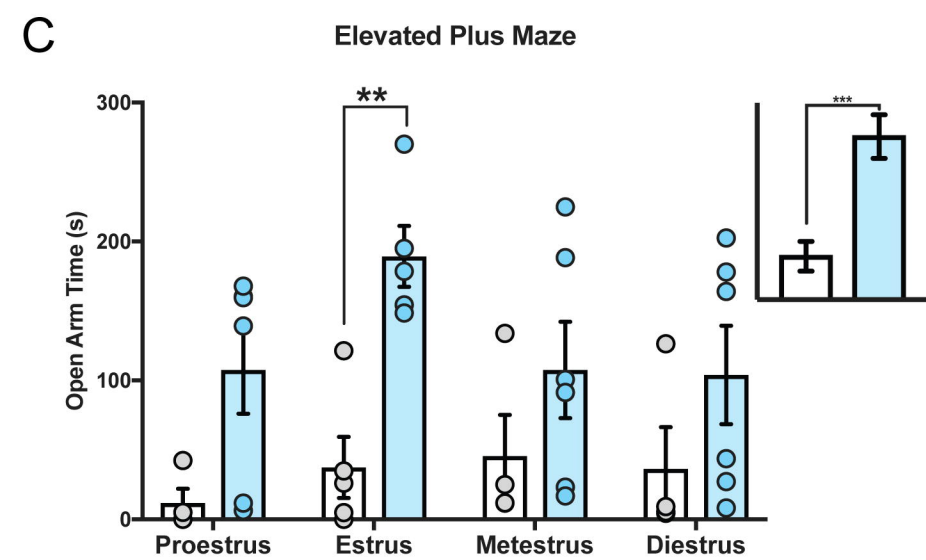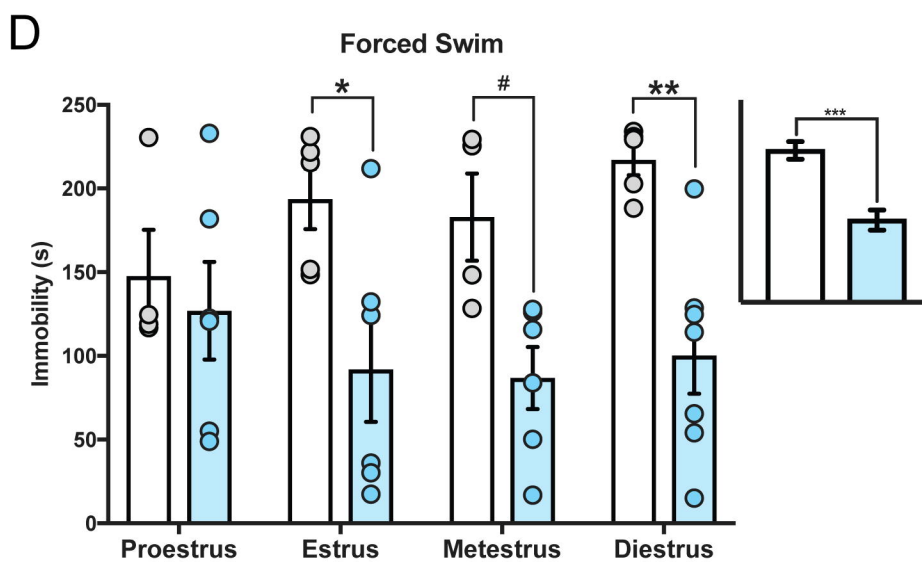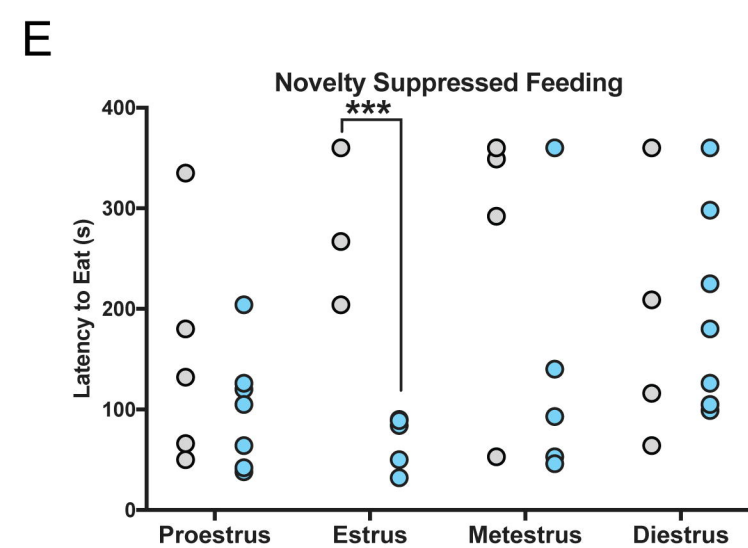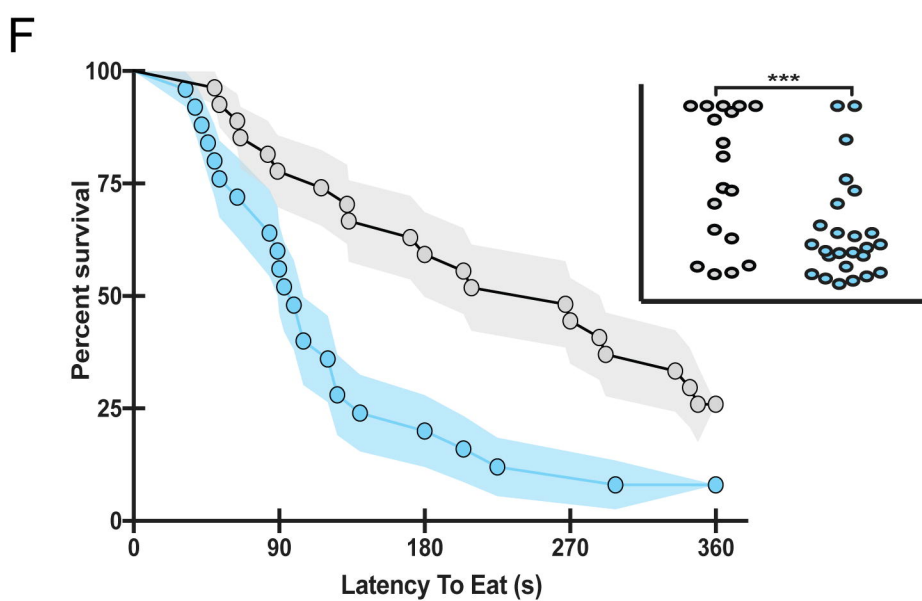

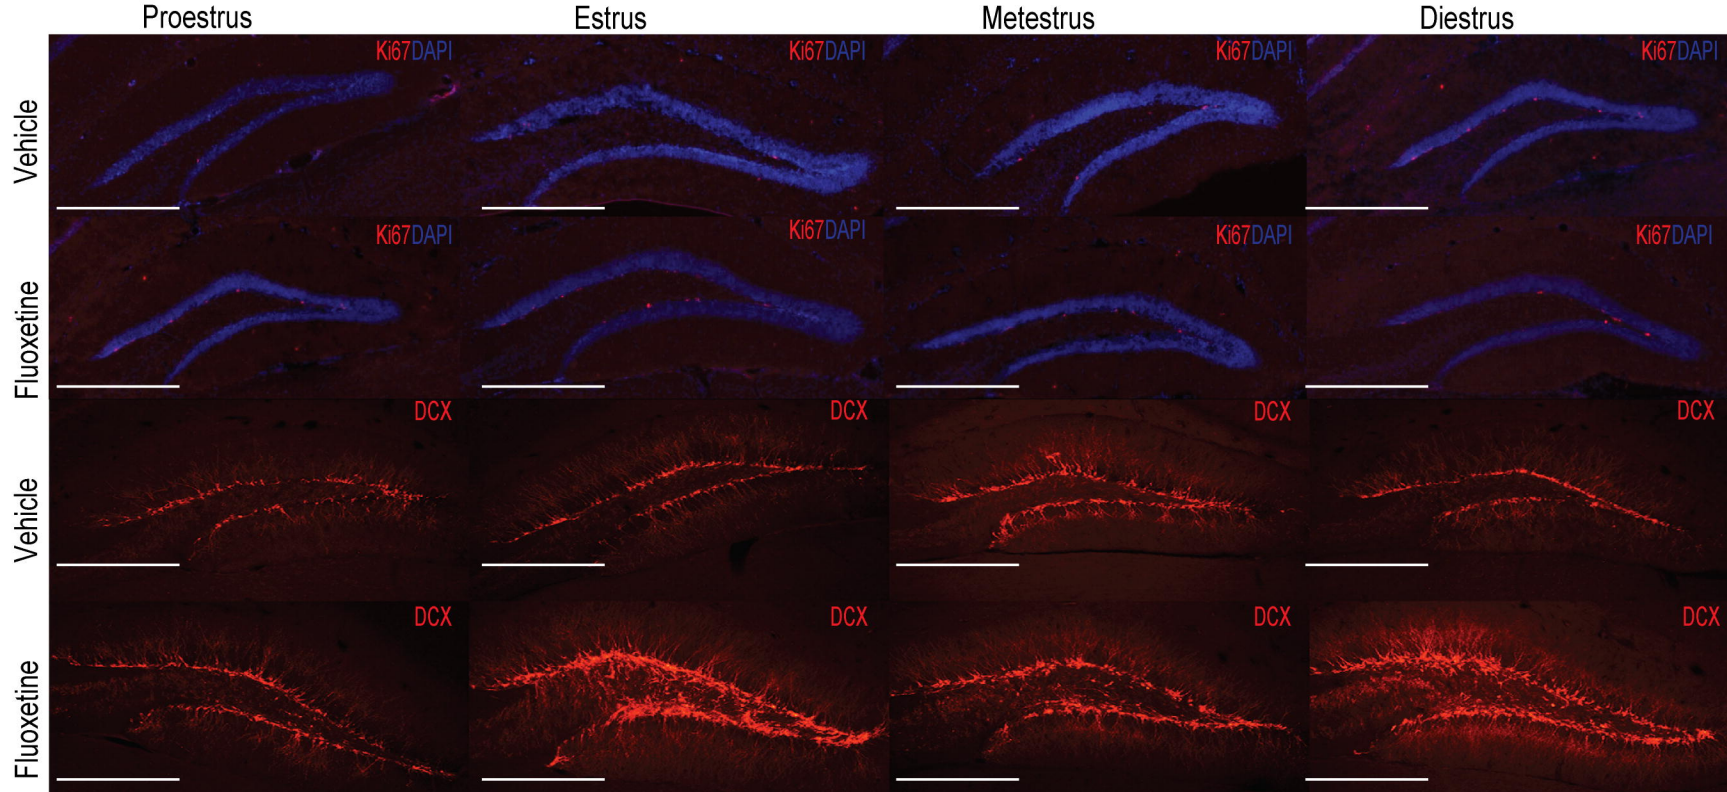

**A**

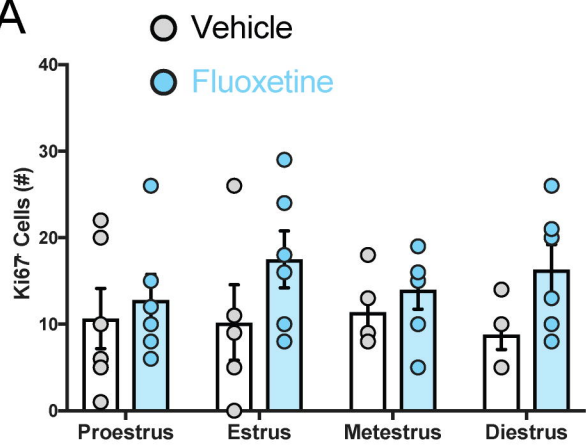

**B**

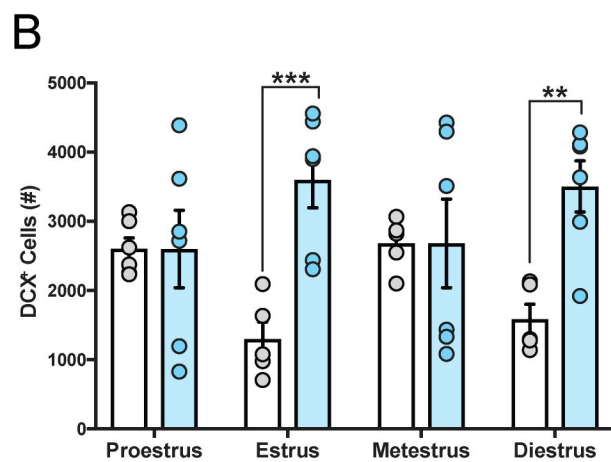

**C**

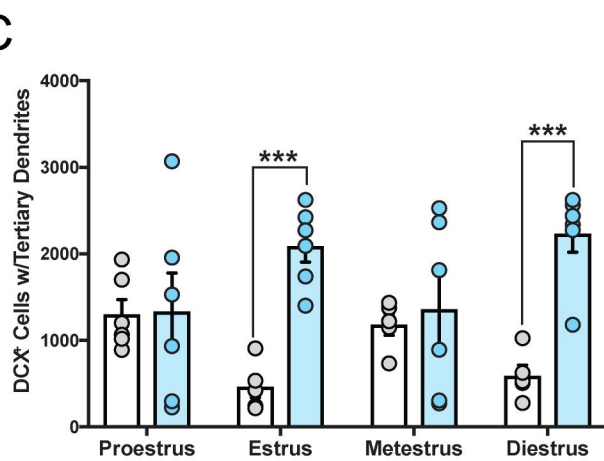

**D**

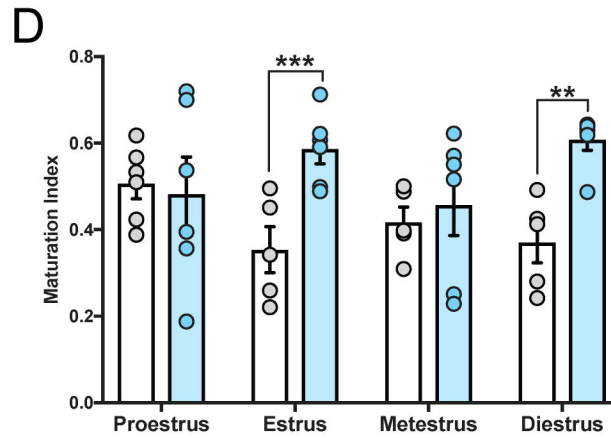



**A**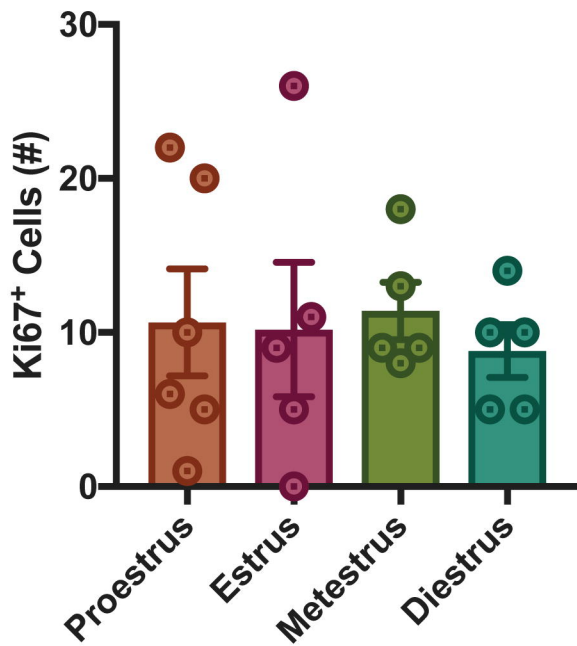**B**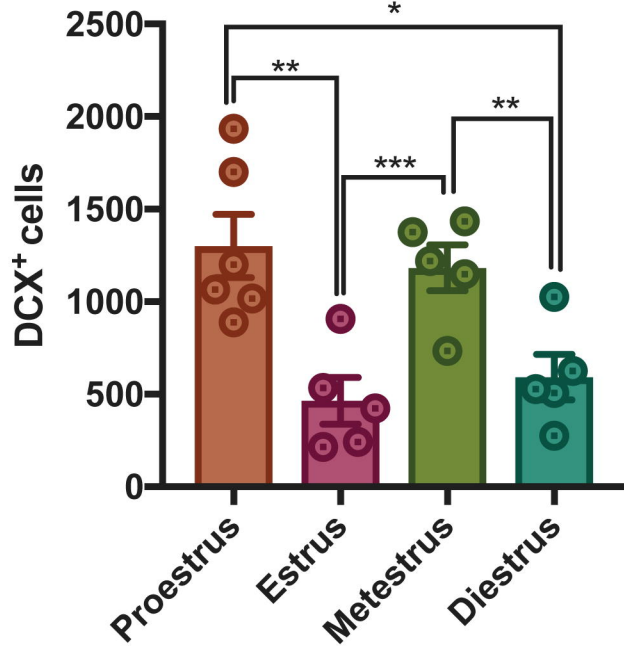**C**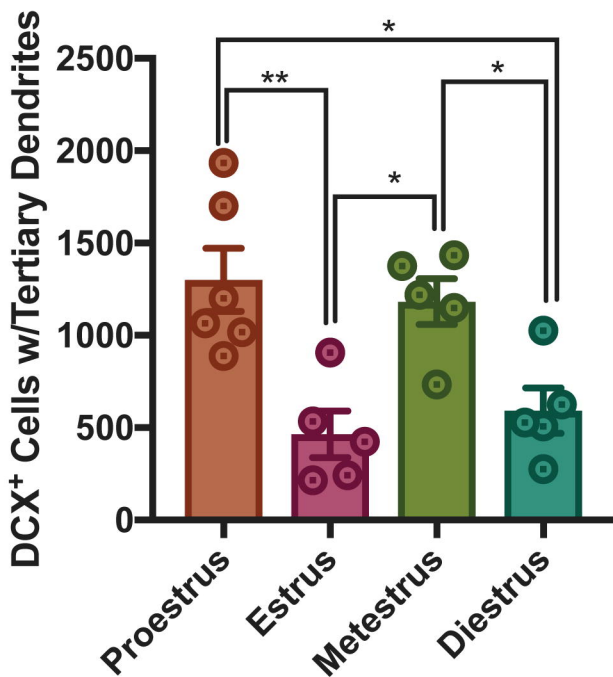**D**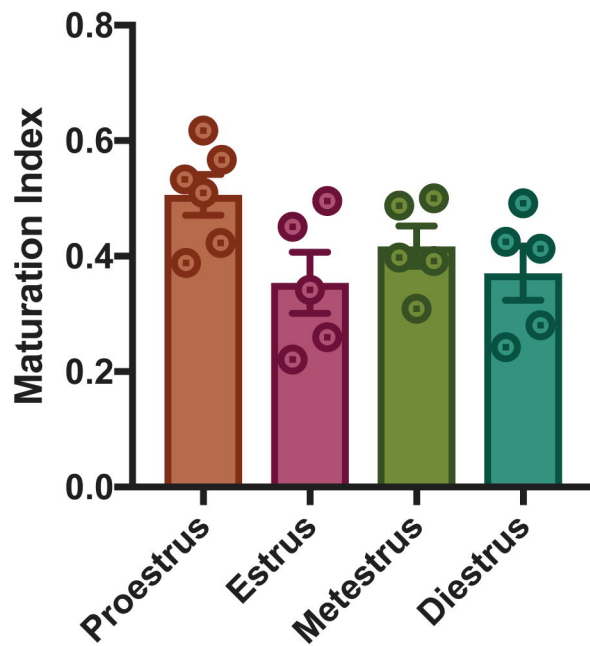

Source: https://www.biorxiv.org/content/10.1101/368449v1.full.pdf
